# Supplementary material for: Effects of Transport Conditions on Behavioural and Physiological Responses of Horses
Source: PubMed Central journal article supplement (PMC7022509; doi:10.3390/ani10010160), 2020-01-17
Supplement: animals-10-00160-s001.pdf [file animals-10-00160-s001.pdf]

**Table S1:** Effect of treatment (T)(transportation vs stock), hour (H)(first, second to twelfth hour) and their interaction (I) as fixed effects on the studied behaviour. Data are expressed as the least square mean and standard error (SE), with P value determined by linear mixed model and Tukey post-hoc testing. Means on the same line with different superscript differ significantly (A, B, C, D, E, F P<0.01); means on the same column with different superscript differ significantly (e,f P<0.05)

| Behavior             | Treatment | H1                   | H2                   | H3                  | H4                   | H5                   | H6                   | H7                   | H8                   | H9                   | H10                  | H11                  | H12                 | SE   | P (T)  | P (H)  | P (I) |
|----------------------|-----------|----------------------|----------------------|---------------------|----------------------|----------------------|----------------------|----------------------|----------------------|----------------------|----------------------|----------------------|---------------------|------|--------|--------|-------|
| Backwards movement   | Stock     | 6.9                  | 3.8                  | 2.8                 | 1.8                  | 4.2                  | 5.2                  | 4.3                  | 3.0                  | 2.5                  | 5.2                  | 3.5                  | 6.7                 | 9.6  | 0.599  | 0.004  | 0.046 |
|                      | Journey   | 6.7 <sup>AD</sup>    | 6.4 <sup>ACD</sup>   | 5.4 <sup>D</sup>    | 11.3                 | 16.2 <sup>E</sup>    | 11.8 <sup>EF</sup>   | 10.2 <sup>F</sup>    | 11.2 <sup>F</sup>    | 8.6 <sup>ABF</sup>   | 11.9 <sup>B</sup>    | 9.3 <sup>AC</sup>    | 14.0 <sup>BEF</sup> | 6.8  |        |        |       |
| Explorative behavior | Stock     | 3.7 <sup>A</sup>     | 3.2                  | 2.1                 | 0.7 <sup>B</sup>     | 2.6                  | 2.6                  | 3.6 <sup>A</sup>     | 0.8 <sup>B</sup>     | 1.3                  | 1.5                  | 1.5                  | 2.3                 | 1.5  | 0.923  | 0.001  | 0.469 |
|                      | Journey   | 5.5 <sup>A</sup>     | 2.7 <sup>AB</sup>    | 2.1                 | 2.0                  | 3.6 <sup>AC</sup>    | 0.9 <sup>BD</sup>    | 1.2 <sup>B</sup>     | 0.6 <sup>D</sup>     | 0.7 <sup>D</sup>     | 1.5 <sup>BC</sup>    | 0.7 <sup>C</sup>     | 2.7 <sup>ABC</sup>  | 1.1  |        |        |       |
| Foreword movement    | Stock     | 7.4                  | 4.3                  | 2.6                 | 2.6                  | 4.8                  | 6.3                  | 4.7                  | 3.5                  | 2.6                  | 6.7                  | 4.5                  | 6.6                 | 10.1 | 0.718  | 0.035  | 0.388 |
|                      | Journey   | 6.2 <sup>AC</sup>    | 6.1 <sup>C</sup>     | 5.5 <sup>C</sup>    | 9.6                  | 13.9 <sup>B</sup>    | 10.7                 | 9.1                  | 9.8                  | 7.6                  | 10.5                 | 8.1 <sup>ADE</sup>   | 12.4 <sup>ABE</sup> | 7.2  |        |        |       |
| Scratching           | Stock     | 2.1                  | 2.2                  | 1.0                 | 2.0                  | 1.4                  | 2.4                  | 0.7                  | 1.6                  | 6.3                  | 0.7                  | 0.3                  | 1.7                 | 1.6  | 0.504  | 0.457  | 0.676 |
|                      | Journey   | 4.3                  | 4.1                  | 1.7                 | 1.7                  | 1.2                  | 1.9                  | 1.7                  | 2.8                  | 2.2                  | 2.9                  | 1.6                  | 1.3                 |      |        |        |       |
| Head surveying       | Stock     | 13.7 <sup>e</sup>    | 13.9 <sup>e</sup>    | 4.6 <sup>e</sup>    | 8.5 <sup>e</sup>     | 10.7 <sup>e</sup>    | 6.2 <sup>e</sup>     | 8.7 <sup>e</sup>     | 3.5 <sup>e</sup>     | 7.7 <sup>e</sup>     | 6.5 <sup>e</sup>     | 5.2 <sup>e</sup>     | 13.9 <sup>e</sup>   | 5.8  | <0.001 | <0.001 | 0.025 |
|                      | Journey   | 45.1 <sup>Af</sup>   | 36.9 <sup>ABDf</sup> | 32.7 <sup>BDf</sup> | 31.4 <sup>BDf</sup>  | 41.6 <sup>ABDf</sup> | 34.6 <sup>ABDf</sup> | 27.1 <sup>Df</sup>   | 35.4 <sup>ABDf</sup> | 31.2 <sup>BDf</sup>  | 38.1 <sup>ABDf</sup> | 33.6 <sup>ABDf</sup> | 65.4 <sup>Cf</sup>  | 4.5  |        |        |       |
| Head tossing         | Stock     | 5.1                  | 4.5                  | 3.3                 | 3.0                  | 4.7                  | 2.9                  | 4.4                  | 4.7                  | 3.4 <sup>e</sup>     | 3.7 <sup>e</sup>     | 3.6 <sup>e</sup>     | 4.7                 | 3.9  | 0.001  | 0.898  | 0.771 |
|                      | Journey   | 5.7                  | 6.1                  | 7.0                 | 5.8                  | 6.8                  | 11.3                 | 9.9                  | 7.7                  | 13.3 <sup>f</sup>    | 14.3 <sup>f</sup>    | 15.4 <sup>f</sup>    | 12.3                | 2.8  |        |        |       |
| Interaction          | Stock     | 6.5                  | 4.8                  | 2.8 <sup>A</sup>    | 1.7                  | 4.7                  | 5.2                  | 9.5 <sup>B</sup>     | 0.6 <sup>A</sup>     | 1.6 <sup>A</sup>     | 2.8 <sup>A</sup>     | 2.8 <sup>A</sup>     | 5.5                 | 4.4  | 0.263  | 0.025  | 0.414 |
|                      | Journey   | 9.2                  | 8.1                  | 9.6                 | 9.4                  | 8.7                  | 12.3 <sup>A</sup>    | 9.5                  | 8.5                  | 7.3                  | 9.7 <sup>B</sup>     | 7.8                  | 11.7                | 3.2  |        |        |       |
| Lateral movement     | Stock     | 8.9                  | 8.7                  | 8.1                 | 5.4                  | 9.6                  | 9.7                  | 9.3                  | 6.5                  | 8.0                  | 7.0                  | 9.0                  | 9.2                 | 15.7 | 0.107  | 0.166  | 0.375 |
|                      | Journey   | 37.3                 | 38.1                 | 28.1                | 40.3                 | 39.1                 | 30.9                 | 33.4                 | 37.1                 | 43.0                 | 40.3                 | 44.7                 | 45.1                | 11.2 |        |        |       |
| Leaning              | Stock     | 1.3 <sup>e</sup>     | 1.2 <sup>e</sup>     | 1.3 <sup>f</sup>    | 0.1 <sup>e</sup>     | 1.9 <sup>e</sup>     | 2.3 <sup>e</sup>     | 1.5 <sup>e</sup>     | 1.0 <sup>e</sup>     | 1.9 <sup>e</sup>     | 1.7 <sup>e</sup>     | 3.0 <sup>e</sup>     | 2.7 <sup>e</sup>    | 14.1 | 0.001  | 0.187  | 0.342 |
|                      | Journey   | 63.4 <sup>Af</sup>   | 51.3 <sup>Af</sup>   | 38.2 <sup>Bf</sup>  | 45.9 <sup>Af</sup>   | 55.4 <sup>Af</sup>   | 51.3 <sup>Af</sup>   | 57.6 <sup>Af</sup>   | 56.3 <sup>Af</sup>   | 56.4 <sup>Af</sup>   | 51.2 <sup>Af</sup>   | 60.9 <sup>Af</sup>   | 55.4 <sup>Af</sup>  | 10.1 |        |        |       |
| Licking              | Stock     | 2.5                  | 1.8                  | 1.7                 | 1.9                  | 2.1                  | 3.0                  | 2.0                  | 1.6                  | 1.8                  | 1.7                  | 1.4                  | 2.3                 | 9.5  | 0.102  | 0.781  | 0.803 |
|                      | Journey   | 17.7                 | 20.2                 | 16.5                | 22.1                 | 22.9                 | 21.4                 | 25.3                 | 21.7                 | 21.8                 | 15.7                 | 18.4                 | 15.0                | 6.7  |        |        |       |
| Loss of balance      | Stock     | 0                    | 0                    | 0                   | 0                    | 0                    | 0                    | 0                    | 0                    | 0                    | 0                    | 0                    | 0                   | 11.8 | 0.296  | 0.076  | 0.088 |
|                      | Journey   | 20.5 <sup>AD</sup>   | 10.5 <sup>BC</sup>   | 5.0 <sup>C</sup>    | 13.1 <sup>AB</sup>   | 20.6 <sup>D</sup>    | 15.3 <sup>BD</sup>   | 11.2 <sup>BC</sup>   | 13.1 <sup>BC</sup>   | 13.6 <sup>BD</sup>   | 16.1 <sup>ABD</sup>  | 13.4 <sup>BD</sup>   | 10.9 <sup>BD</sup>  | 8.3  |        |        |       |
| Pawing               | Stock     | 3.4                  | 1.7                  | 0.6                 | 0.7                  | 0.8                  | 3.0                  | 1.1                  | 0.8                  | 0.4                  | 0.6                  | 1.4                  | 0.8                 | 1.2  | 0.201  | 0.024  | 0.945 |
|                      | Journey   | 4.6 <sup>A</sup>     | 0.9 <sup>B</sup>     | 0.4 <sup>B</sup>    | 0.6 <sup>B</sup>     | 0.6 <sup>B</sup>     | 0 <sup>B</sup>       | 0.3 <sup>B</sup>     | 0.1 <sup>B</sup>     | 0 <sup>B</sup>       | 0 <sup>B</sup>       | 0.3 <sup>B</sup>     | 0.4 <sup>B</sup>    | 0.9  |        |        |       |
| Touching tie rope    | Stock     | 0.2 <sup>e</sup>     | 0 <sup>e</sup>       | 0 <sup>e</sup>      | 0 <sup>e</sup>       | 0 <sup>e</sup>       | 0 <sup>e</sup>       | 0 <sup>e</sup>       | 0 <sup>e</sup>       | 0 <sup>e</sup>       | 0 <sup>e</sup>       | 0 <sup>e</sup>       | 0 <sup>e</sup>      | 4.8  | 0.001  | 0.505  | 0.692 |
|                      | Journey   | 19.9 <sup>ABf</sup>  | 20.5 <sup>Bf</sup>   | 12.5 <sup>f</sup>   | 13.7 <sup>f</sup>    | 12.0 <sup>f</sup>    | 9.4 <sup>Cf</sup>    | 12.6 <sup>f</sup>    | 15.2 <sup>f</sup>    | 11.5 <sup>f</sup>    | 13.9 <sup>ABf</sup>  | 16.4 <sup>f</sup>    | 20.5 <sup>f</sup>   | 3.6  |        |        |       |
| Turning the head     | Stock     | 24.3 <sup>e</sup>    | 22.1                 | 12.7 <sup>Ae</sup>  | 14.4 <sup>Ae</sup>   | 21.1                 | 17.9                 | 20.4                 | 13.0 <sup>Ae</sup>   | 16.1                 | 14.2 <sup>Ae</sup>   | 11.8 <sup>Ae</sup>   | 26.7 <sup>B</sup>   | 5.2  | <0.001 | 0.001  | 0.838 |
|                      | Journey   | 38.3 <sup>Af</sup>   | 25.8 <sup>B</sup>    | 24.7 <sup>Bf</sup>  | 29.8 <sup>f</sup>    | 27.9 <sup>B</sup>    | 26.7                 | 26.2                 | 26.1 <sup>f</sup>    | 21.9                 | 28.1 <sup>f</sup>    | 22.5 <sup>f</sup>    | 36.4 <sup>A</sup>   | 4.2  |        |        |       |
| Total behaviour      | Stock     | 84.1 <sup>Ae</sup>   | 68.9 <sup>e</sup>    | 37.3 <sup>Be</sup>  | 39.2 <sup>e</sup>    | 64.9 <sup>e</sup>    | 65.0 <sup>e</sup>    | 66.7 <sup>e</sup>    | 36.8 <sup>Be</sup>   | 50.7 <sup>e</sup>    | 49.8 <sup>e</sup>    | 43.9 <sup>e</sup>    | 80.7 <sup>Ae</sup>  | 50.7 | 0.001  | <0.001 | 0.333 |
|                      | Journey   | 283.7 <sup>Af</sup>  | 238.0 <sup>B</sup>   | 190.9 <sup>B</sup>  | 236.6 <sup>B</sup>   | 269.4                | 241.9 <sup>B</sup>   | 235.1 <sup>B</sup>   | 244.8 <sup>B</sup>   | 244.0 <sup>B</sup>   | 260.8 <sup>B</sup>   | 257.2 <sup>B</sup>   | 298.7 <sup>A</sup>  | 36.1 |        |        |       |
| Total stress         | Stock     | 52.2 <sup>Ae</sup>   | 45.7 <sup>e</sup>    | 22.2 <sup>Be</sup>  | 27.2 <sup>e</sup>    | 39.5 <sup>e</sup>    | 35.7 <sup>e</sup>    | 36.8 <sup>e</sup>    | 21.7 <sup>Be</sup>   | 33.8 <sup>e</sup>    | 25.8 <sup>e</sup>    | 20.6 <sup>Be</sup>   | 49.5 <sup>e</sup>   | 11.9 | <0.001 | 0.001  | 0.792 |
|                      | Journey   | 141.6 <sup>ACf</sup> | 118.4 <sup>f</sup>   | 100.1 <sup>Bf</sup> | 108.6 <sup>Bf</sup>  | 116.8 <sup>f</sup>   | 111.0 <sup>Bf</sup>  | 105.4 <sup>Bf</sup>  | 110.2 <sup>Bf</sup>  | 108.9 <sup>Bf</sup>  | 122.4 <sup>ABf</sup> | 114.1 <sup>ABf</sup> | 150.4 <sup>Cf</sup> | 9.1  |        |        |       |
| Total balance        | Stock     | 20.7 <sup>e</sup>    | 14.4 <sup>e</sup>    | 8.2 <sup>e</sup>    | 6.2 <sup>e</sup>     | 16.8 <sup>e</sup>    | 20.1 <sup>e</sup>    | 16.3 <sup>e</sup>    | 10.4 <sup>e</sup>    | 11.3 <sup>e</sup>    | 17.2 <sup>e</sup>    | 16.5 <sup>e</sup>    | 21.7 <sup>e</sup>   | 34.9 | 0.008  | 0.023  | 0.345 |
|                      | Journey   | 126.4 <sup>ACf</sup> | 109.6 <sup>Cf</sup>  | 79.2 <sup>Bf</sup>  | 117.7 <sup>ACf</sup> | 142.9 <sup>Af</sup>  | 117.6 <sup>ACf</sup> | 119.2 <sup>ACf</sup> | 125.1 <sup>ACf</sup> | 126.8 <sup>ACf</sup> | 127.6 <sup>ACf</sup> | 133.4 <sup>ACf</sup> | 134.7 <sup>Af</sup> | 24.9 |        |        |       |

**Table S2:** Effect of treatment (transportation vs stock), time (before (T0) vs after (T1) transportation or stock) and their interaction (I) as fixed effects on the clinical parameters. Data are expressed as the least square mean and standard error (SE), with P value determined by linear mixed model and Tukey post-hoc testing. Means on the same line with different superscript differ significantly (A, B, P<0.01; a, b P<0.05); means on the same column with different superscript differ significantly (E, F P<0.01; e, f P<0.05)

| Paramter                         | Treatment | T0                   | T1                  | SE   | P (T) | P (H)  | P (I)  |
|----------------------------------|-----------|----------------------|---------------------|------|-------|--------|--------|
| <b>Body weight</b>               | Stock     | 527.8 <sup>A,e</sup> | 513 <sup>B</sup>    | 12.5 | 0.101 | <0.001 | 0.024  |
|                                  | Journey   | 518.8 <sup>f</sup>   | 514.4               | 12.4 |       |        |        |
| <b>Hear rate</b>                 | Stock     | 38.6                 | 36.3 <sup>E</sup>   | 2.3  | 0.242 | 0.002  | <0.001 |
|                                  | Journey   | 32.7 <sup>A</sup>    | 46.9 <sup>B,F</sup> | 1.7  |       |        |        |
| <b>Respiratory rate</b>          | Stock     | 9.8                  | 10.9                | 1.4  | 0.012 | 0.289  | 0.839  |
|                                  | Journey   | 12.7                 | 14.3                | 1.0  |       |        |        |
| <b>Rectal Temperature</b>        | Stock     | 37.3 <sup>e</sup>    | 37.4 <sup>e</sup>   | 0.1  | 0.957 | <0.001 | <0.001 |
|                                  | Journey   | 37.0 <sup>A,f</sup>  | 37.8 <sup>B,f</sup> | 0.1  |       |        |        |
| <b>Capillary refilling time</b>  | Stock     | 1.0 <sup>A,E</sup>   | 1.6 <sup>B</sup>    | 0.1  | 0.030 | 0.001  | <0.001 |
|                                  | Journey   | 1.5 <sup>F</sup>     | 1.4                 | 0.1  |       |        |        |
| <b>Gut sounds</b>                | Stock     | 7.9 <sup>A</sup>     | 6.5 <sup>B,E</sup>  | 0.3  | 0.005 | <0.001 | 0.002  |
|                                  | Journey   | 8.0 <sup>A</sup>     | 4.8 <sup>B,F</sup>  | 0.2  |       |        |        |
| <b>Sum Squamous ulcerations</b>  | Stock     | 0.6                  | 1.4 <sup>E</sup>    | 0.6  | 0.003 | <0.001 | 0.009  |
|                                  | Journey   | 1.2 <sup>A</sup>     | 4.5 <sup>B,F</sup>  | 0.4  |       |        |        |
| <b>Sum Glandular ulcerations</b> | Stock     | 1.0                  | 1.3                 | 0.2  | 0.862 | 0.416  | 0.416  |
|                                  | Journey   | 1.2                  | 1.2                 | 0.2  |       |        |        |
| <b>RBC</b>                       | Stock     | 8.2 <sup>a</sup>     | 7.5 <sup>b</sup>    | 0.3  | 0.821 | 0.308  | 0.001  |
|                                  | Journey   | 7.6                  | 8.0                 | 0.2  |       |        |        |
| <b>HCT</b>                       | Stock     | 38.0 <sup>a</sup>    | 32. <sup>0be</sup>  | 0.0  | 0.504 | 0.140  | 0.002  |
|                                  | Journey   | 34.8                 | 37.0 <sup>f</sup>   | 0.0  |       |        |        |
| <b>WBC</b>                       | Stock     | 8.2 <sup>a</sup>     | 6.7 <sup>b,E</sup>  | 0.4  | 0.089 | 0.307  | <0.001 |
|                                  | Journey   | 7.0 <sup>A</sup>     | 9.0 <sup>B,F</sup>  | 0.3  |       |        |        |
| <b>Neutrophils (N)</b>           | Stock     | 4.6                  | 4.6 <sup>E</sup>    | 0.4  | 0.011 | <0.001 | <0.001 |
|                                  | Journey   | 3.8 <sup>A</sup>     | 7.2 <sup>B,F</sup>  | 0.3  |       |        |        |
| <b>Lymphocytes (L)</b>           | Stock     | 3.1 <sup>A</sup>     | 1.8 <sup>B</sup>    | 0.2  | 0.020 | <0.001 | 0.631  |
|                                  | Journey   | 2.7 <sup>A</sup>     | 1.5 <sup>B</sup>    | 0.1  |       |        |        |
| <b>N/L</b>                       | Stock     | 1.5                  | 2.8 <sup>E</sup>    | 0.5  | 0.002 | <0.001 | 0.002  |
|                                  | Journey   | 1.5 <sup>A</sup>     | 5.6 <sup>B,F</sup>  | 0.4  |       |        |        |
| <b>Fibrinogen</b>                | Stock     | 2.0                  | 2.1                 | 0.1  | 0.210 | 0.025  | 0.378  |
|                                  | Journey   | 2.0 <sup>a</sup>     | 2.3 <sup>b</sup>    | 0.1  |       |        |        |
| <b>Total proteins</b>            | Stock     | 71.1 <sup>E</sup>    | 74.1                | 1.2  | 0.061 | <0.001 | 0.003  |
|                                  | Journey   | 67.1 <sup>A,F</sup>  | 74.8 <sup>B</sup>   | 0.9  |       |        |        |

|                 |         |                     |                      |      |        |        |        |
|-----------------|---------|---------------------|----------------------|------|--------|--------|--------|
| <b>Albumin</b>  | Stock   | 33.6 <sup>E</sup>   | 34.7                 | 0.4  | 0.018  | <0.001 | <0.001 |
|                 | Journey | 31.5 <sup>A,F</sup> | 35.3 <sup>B</sup>    | 0.3  |        |        |        |
| <b>CK</b>       | Stock   | 307.8               | 304.2 <sup>e</sup>   | 60.9 | 0.019  | 0.124  | 0.108  |
|                 | Journey | 353.3 <sup>a</sup>  | 512.2 <sup>b,f</sup> | 44.1 |        |        |        |
| <b>AST</b>      | Stock   | 277.9               | 282.7                | 8.1  | 0.887  | 0.001  | 0.003  |
|                 | Journey | 261.1 <sup>A</sup>  | 301.4 <sup>B</sup>   | 6.2  |        |        |        |
| <b>Na</b>       | Stock   | 134.8               | 135.2                | 0.4  | 0.834  | 0.207  | 0.544  |
|                 | Journey | 134.6               | 135.3                | 0.4  |        |        |        |
| <b>K</b>        | Stock   | 3.4                 | 3.5 <sup>e</sup>     | 0.0  | 0.490  | 0.138  | 0.001  |
|                 | Journey | 3.5 <sup>A</sup>    | 3.2 <sup>B,f</sup>   | 0.1  |        |        |        |
| <b>Ca</b>       | Stock   | 1.5                 | 1.5                  | 0.0  | 0.339  | 0.068  | 0.383  |
|                 | Journey | 1.5                 | 1.6                  | 0.0  |        |        |        |
| <b>Glucose</b>  | Stock   | 4.8                 | 5.1                  | 0.2  | <0.001 | <0.001 | <0.001 |
|                 | Journey | 4.8                 | 7.1                  | 0.2  |        |        |        |
| <b>Lactate</b>  | Stock   | 0.7                 | 0.7 <sup>E</sup>     | 0.1  | 0.000  | 0.724  | 0.026  |
|                 | Journey | 0.8                 | 0.9 <sup>F</sup>     | 0.1  |        |        |        |
| <b>Cortisol</b> | Stock   | 87.1 <sup>A</sup>   | 156.6 <sup>B,e</sup> | 9.5  | 0.003  | <0.001 | 0.446  |
|                 | Journey | 68.7 <sup>A</sup>   | 126.6 <sup>Bf</sup>  | 6.8  |        |        |        |

**Table S3:** Wald test P-values generated from univariate regression analysis

| <b>Predictive Variable</b> | <b>Clinical ESGD</b> |
|----------------------------|----------------------|
| Cortisol                   | 0.076                |
| Head Surveying             | 0.198                |
| Head Tossing               | 0.075                |
| Hear Rate                  | 0.021                |
| Interaction                | 0.081                |
| Leaning                    | 0.129                |
| Licking                    | 0.136                |
| Loss of balance            | 0.036                |
| Scratching                 | 0.083                |
| RT                         | 0.023                |
| Touching the cord          | 0.201                |
| Turning the head           | 0.105                |
| Total stress               | 0.070                |
| Total balance              | 0.140                |
| Total behaviour            | 0.074                |
